# Supplementary material for: Structural basis of proton-coupled potassium transport in the KUP family
Source: Nat Commun. 2020 Jan 31;11:626. doi: 10.1038/s41467-020-14441-7 (PMC6994465; doi:10.1038/s41467-020-14441-7)
Supplement: Supplementary file 4 — source data file [file 41467_2020_14441_MOESM4_ESM.xlsx]

## Sheet: fig1a
1st repetition (shown in the paper)
	0,05 mM KCl extracellular		0,1 mM KCl extracellular		0,2 mM KCl extracellular		0,5 mM KCl extracellular		1 mM KCl extracellular		2 mM KCl extracellular
t (min)	[KCl] (µM)	t (min)	[KCl] (µM)	t (min)	[KCl] (µM)	t (min)	[KCl] (µM)	t (min)	[KCl] (µM)	t (min)	[KCl] (µM)
0	0	0	0	0	0	0	0	0	0	0	0
0.82	32	0.81	64	0.75	96	0.82	136	0.77	152	0.75	176
1.55	32	1.65	80	1.58	128	1.63	192	1.53	208	1.56	240
3.28	40	3.18	88	3.11	144	3.31	224	3.23	256	3.2	288
4.31	40	4.56	88	4.5	152	4.63	248	4.38	265	4.56	312
6.4	40	6.95	96	6.88	160	6.95	256	6.9	304	6.88	328
8.63	40	8.95	96	8.88	160	8.95	256	8.9	304	8.88	328
2nd repetition
	0,05 mM KCl extracellular		0,1 mM KCl extracellular		0,2 mM KCl extracellular		0,5 mM KCl extracellular		1 mM KCl extracellular		2 mM KCl extracellular
t (min)	[KCl] (µM)	t (min)	[KCl] (µM)	t (min)	[KCl] (µM)	t (min)	[KCl] (µM)	t (min)	[KCl] (µM)	t (min)	[KCl] (µM)
0	0	0	0	0	0	0	0	0	0	0	0
0.95	40	0.81	64	0.85	104	0.85	136	0.75	144	0.75	160
1.7	32	1.65	88	1.62	136	1.62	200	1.48	184	1.48	200
3.45	40	3.18	88	3.31	128	3.31	232	3.21	192	3.21	232
4.92	32	4.56	96	4.46	136	4.46	256	4.25	224	4.25	272
7.08	32	6.95	96	6.98	144	6.98	296	6.33	256	6.33	304
8.95	40	8.95	96	8.98	136	8.98	296	8.55	264	8.55	296
3rd repetition
	0,05 mM KCl extracellular		0,1 mM KCl extracellular		0,2 mM KCl extracellular		0,5 mM KCl extracellular		1 mM KCl extracellular		2 mM KCl extracellular
t (min)	[KCl] (µM)	t (min)	[KCl] (µM)	t (min)	[KCl] (µM)	t (min)	[KCl] (µM)	t (min)	[KCl] (µM)	t (min)	[KCl] (µM)
0	0	0	0	0	0	0	0	0	0	0	0
1.13	32	0.95	72	0.82	112	0.75	136	0.75	152	0.77	176
2.1	40	1.7	72	1.63	144	1.58	184	1.56	216	1.53	240
4.02	48	3.45	72	3.31	136	3.11	232	3.2	248	3.23	288
6	40	4.92	72	4.63	152	4.5	248	4.56	272	4.38	312
10	40	7.08	72	6.95	144	6.88	280	6.88	296	6.9	344
		8.95	80	8.95	144	8.88	288	8.88	328	8.9	344

## Sheet: fig1b
KCl extracellular (mM)	initial rate 1st repetition (µM/min)	initial rate 2nd repetition (µM/min)	initial rate 3rd repetition (µM/min)	initial rate (mean) (µM/min)	initial rate (standard deviation) (µM/min)
0	0	0	0	0	0
0.05	39.02	28.32	42.1	36.48	7.23262
0.1	79.01	75.79	79.01	77.9367	1.85907
0.2	128	122.35	136.58	128.977	7.1651
0.5	165.85	165.85	181.33	169.06	11.0214
1	197.4	192	202.67	197.357	5.33513
2	228.57	213.33	234.67	225.523	10.9914

## Sheet: fig1c
1st repetition (shown in the paper)
	pH 6	pH 6,5		pH 7,5	pH 8	pH 6 + cccp
t (min)	[KCl] (µM)	[KCl] (µM)	t (min)	[KCl] (µM)	[KCl] (µM)	[KCl] (µM)
0	0	0	0	0	0	0
0.85	192	184	0.93	140	104	8
1.55	248	232	1.63	180	120	0
3.35	288	272	3.43	212	144	0
4.53	320	312	4.61	228	144	0
6.88	352	344	6.96	252	144	0
8.88	376	368	8.96	260	144	0
2nd repetition
	pH 6	pH 6,5		pH 7,5	pH 8	pH 6 + cccp
t (min)	[KCl] (µM)	[KCl] (µM)	t (min)	[KCl] (µM)	[KCl] (µM)	[KCl] (µM)
0	0	0	0	0	0	0
0.76	128	112	0.83	88	40	8
1.66	168	152	1.8	136	64	8
3.23	192	184	3.3	152	72	0
4.61	216	200	4.68	168	72	0
6.9	240	216	6.96	184	88	0
8.9	264	232	8.96	192	88	0
3rd repetition
	pH 6	pH 6,5		pH 7,5	pH 8	pH 6 + cccp
t (min)	[KCl] (µM)	[KCl] (µM)	t (min)	[KCl] (µM)	[KCl] (µM)	[KCl] (µM)
0	0	0	0	0	0	0
1	168	136	1	112	72	0
2	192	160	2	120	80	0
4	240	200	4	144	96	0
6	280	216	6	160	96	8
8	320	256	8	192	128	8
10	352	288	10	216	136	0

## Sheet: fig1d
	KimA-1	KimA-2	KimA-3 (shown in paper)	empty-1 (shown in paper)	empty-2	empty-3		KimA-1	KimA-2	KimA-3	empty-1	empty-2	empty-3
t (min)	normalized fluorescence	normalized fluorescence	normalized fluorescence	normalized fluorescence	normalized fluorescence	normalized fluorescence		fluorescence	fluorescence	fluorescence	fluorescence	fluorescence	fluorescence
0	0.90574	0.93179	0.92296	0.9346	0.96403	0.91996		933858	947318	948322	692011	770187	769094
0.08333	0.90044	0.93118	0.92001	0.9297	0.9613	0.91186		930333	946911	946356	690038	766358	765918
0.16667	0.90177	0.933	0.92158	0.91681	0.95784	0.90946		931219	948114	947400	684850	765219	759907
0.25	0.90691	0.92505	0.92022	0.91709	0.95134	0.90582		934638	942858	946482	684962	763497	754960
0.33333	0.90671	0.92429	0.91975	0.90662	0.93969	0.90117		934505	942357	946164	680743	761297	752515
0.41667	0.90354	0.92302	0.91754	0.98789	0.9349	1		932394	941519	944690	713470	808062	750313
0.5	0.90486	0.92106	0.91724	0.97448	0.93304	0.98462		933275	940225	944483	708073	800783	729401
0.58333	0.90583	0.91844	0.91643	0.97048	0.93239	0.98375		933922	938496	943942	706459	800372	728298
0.66667	0.90823	0.91503	0.91595	0.97376	0.93244	0.98218		935518	936239	943612	707782	799630	727252
0.75	0.90634	0.96515	0.93971	0.96759	0.92151	0.98551		934262	969364	959546	705296	801206	726102
0.83333	0.9091	0.96273	0.93989	0.96881	0.91785	0.98494		936100	967764	959665	705789	800935	724579
0.91667	0.90001	0.95721	0.93263	0.96543	0.91623	0.98035		930046	964116	954814	704425	798763	720873
1	0.90148	0.96082	0.93514	0.9733	0.9761	0.9792		931025	966503	956498	707598	798218	719084
1.08333	0.89942	0.95834	0.93289	0.96866	0.96071	0.98393		929655	964866	954994	705726	800455	722120
1.16667	0.91027	0.96641	0.93858	0.96172	0.9624	0.9809		936876	970196	958781	702934	799025	724976
1.25	0.90703	0.96361	0.93558	0.97085	0.95952	0.9811		934721	968349	956779	706611	799117	718866
1.33333	0.90056	0.96427	0.93267	0.96074	0.95797	0.98175		930411	968787	954843	702540	799427	716277
1.41667	0.9045	0.96016	0.93262	0.96416	0.9588	0.9825		933037	966069	954797	703914	799781	716385
1.5	0.90277	0.96697	0.93511	0.96878	0.95321	0.97891		931885	970569	956472	705775	798084	715974
1.58333	0.90378	0.96966	0.93694	0.96698	0.96638	0.97823		932559	972348	957698	705051	797759	715048
1.66667	0.90249	0.96172	0.93238	0.96227	0.96196	0.97697		931699	967098	954643	703155	797166	714071
1.75	0.9035	0.96714	0.93555	0.95793	0.9566	0.97583		932366	970679	956767	701408	796626	714689
1.83333	1	1	1	0.9956	1	0.99524		996628	992401	999759	716577	805808	715409
1.91667	0.98734	0.99647	0.99193	0.99049	0.99772	0.98919		988200	990069	994379	714518	802945	712548
2	0.98979	0.98759	0.98878	0.9925	0.99874	0.99154		989830	984200	992260	715328	804057	712003
2.08333	0.98594	0.98677	0.98645	1	0.98802	0.99147		987263	983654	990703	718348	804025	709561
2.16667	0.9849	0.98001	0.9826	0.98779	0.9897	0.98853		986570	979189	988124	713432	802632	710239
2.25	0.97888	0.97848	0.97883	0.99726	0.97763	0.99354		982567	978175	985615	717246	805006	709288
2.33333	0.97488	0.97191	0.9736	0.99241	0.97818	0.98551		979899	973835	982112	715289	801203	709350
2.41667	0.96736	0.96828	0.96804	0.9884	0.97922	0.98977		974891	971433	978407	713675	803221	709877
2.5	0.95895	0.9602	0.95986	0.99017	0.96948	0.98926		969292	966097	972939	714388	802979	707059
2.58333	0.95979	0.95361	0.95703	0.98995	0.97241	0.98291		969854	961736	971040	714302	799975	706825
2.66667	0.9568	0.94357	0.95059	0.99369	0.95928	0.98399		967862	955104	966727	715806	800486	705839
2.75	0.94412	0.94414	0.94453	0.99128	0.9552	0.97687		959421	955477	962694	714834	797116	705694
2.83333	0.94032	0.93907	0.94013	0.99347	0.95294	0.97528		956887	952127	959751	715718	796366	703996
2.91667	0.92849	0.9271	0.92832	0.99471	0.94905	0.97277		949010	944215	951857	716216	795177	702030
3	0.92861	0.9283	0.92897	0.98617	0.94807	0.96812		949089	945008	952293	712776	792976	701137
3.08333	0.92078	0.91794	0.91995	0.98574	0.94908	0.96839		943878	938163	946265	712606	793106	697941
3.16667	0.91316	0.9147	0.91454	0.9806	0.94881	0.96114		938801	936018	942654	710537	789674	697697
3.25	0.91042	0.90598	0.90887	0.98083	0.93699	0.95845		936976	930257	938861	710630	788399	694984
3.33333	0.90624	0.8968	0.90226	0.97849	0.92957	0.95555		934196	924191	934438	709687	787031	693789
3.41667	0.90263	0.90089	0.90247	0.97172	0.92646	0.95534		931789	926895	934586	706961	786928	694629
3.5	0.89408	0.88598	0.89085	0.97033	0.9281	0.94841		926094	917040	926812	706402	783652	694137
3.58333	0.89012	0.88129	0.88656	0.96965	0.91869	0.94689		923462	913937	923944	706124	782930	689643
3.66667	0.87943	0.87272	0.87698	0.96488	0.9185	0.94373		916340	908272	917551	704205	781437	685417
3.75	0.87419	0.86817	0.87212	0.97034	0.92232	0.94291		912852	905266	914304	706402	781046	685438
3.83333	0.86435	0.85794	0.86216	0.9653	0.91133	0.93217		906302	898505	907648	704375	775968	685303
3.91667	0.86424	0.85232	0.85934	0.96134	0.90987	0.933		906229	894787	905752	702780	776358	682551
4	0.8483	0.84862	0.84955	0.96018	0.90913	0.9293		895616	892346	899225	702315	774607	680454
4.08333	0.84718	0.8462	0.84779	0.95496	0.90106	0.92943		894867	890742	898049	700209	774670	681753
4.16667	0.84165	0.83254	0.8383	0.95611	0.89404	0.91752		891187	881716	891696	700675	769034	677937
4.25	0.8367	0.82996	0.83455	0.95451	0.8888	0.91576		887891	880010	889195	700028	768199	675220
4.33333	0.83277	0.82587	0.83057	0.95118	0.88051	0.91107		885274	877305	886534	698689	765980	676252
4.41667	0.82801	0.81304	0.81963	0.9499	0.87839	0.91261		882104	868829	879212	698173	766708	672252
4.5	0.81254	0.80928	0.81004	0.94541	0.87068	0.90672		871799	866341	872816	696365	763925	671704
4.58333	0.812	0.80895	0.80961	0.94365	0.86862	0.90218		871443	866122	872529	695658	761774	669011
4.66667	0.79774	0.79786	0.79701	0.93682	0.86367	0.89959		861946	858791	864114	692906	760550	667940
4.75	0.80075	0.79202	0.79564	0.94032	0.85727	0.89283		863948	854930	863185	694316	757349	666348
4.83333	0.78376	0.78266	0.78253	0.93358	0.85562	0.88727		852640	848747	854439	691600	754720	665794
4.91667	0.77754	0.77643	0.77635	0.93237	0.8598	0.88798		848497	844626	850308	691113	755054	662633
5	0.77613	0.7682	0.77159	0.92824	0.84855	0.8865		847556	839187	847118	689451	754358	660206
5.08333	0.77537	0.76634	0.7703	0.9237	0.85257	0.87735		847053	837960	846253	687621	750027	660270
5.16667	0.7602	0.75579	0.75751	0.93006	0.85074	0.88399		836946	830988	837713	690184	753167	662293
5.25	0.76183	0.75133	0.75612	0.92099	0.83729	0.87128		838031	828036	836779	686533	747154	655833
5.33333	0.74646	0.74803	0.74681	0.92249	0.83218	0.86567		827798	825853	830572	687135	744501	657184
5.41667	0.74218	0.7375	0.73948	0.91696	0.82814	0.87795		824947	818898	825669	684910	750310	651016
5.5	0.74159	0.73205	0.7365	0.92107	0.82231	0.85696		824555	815294	823670	686565	740376	651207
5.58333	0.7312	0.72672	0.72868	0.91524	0.82454	0.85513		817637	811773	818451	684215	739510	646335
5.66667	0.72614	0.72156	0.72361	0.90767	0.81716	0.85521		814270	808360	815061	681169	739551	647400
5.75	0.71912	0.7166	0.71765	0.90931	0.81058	0.8473		809592	805083	811084	681826	735807	651306
5.83333	0.71027	0.71107	0.7105	0.90573	0.81425	0.84393		803700	801429	806310	680385	734211	645127
5.91667	0.70851	0.70641	0.70733	0.902	0.81198	0.84253		802530	798349	804185	678886	733549	643627
6	0.70606	0.6935	0.69974	0.89582	0.80196	0.83279		800899	789814	799102	676396	728941	644187
6.08333	0.69691	0.68876	0.69283	0.8982	0.80085	0.82878		794807	786677	794488	677355	727042	636879
6.16667	0.69248	0.68872	0.69059	0.89394	0.79371	0.8254		791852	786650	792997	675639	725442	637613
6.25	0.68618	0.68182	0.68404	0.8949	0.78788	0.81997		787657	782096	788622	676025	722874	637501
6.33333	0.68277	0.68017	0.68152	0.88776	0.78594	0.8187		785390	781001	786942	673150	722273	632462
6.41667	0.67159	0.67019	0.67102	0.88288	0.78585	0.8135		777946	774407	779923	671184	719814	630620
6.5	0.66561	0.66154	0.66376	0.87499	0.78003	0.80997		773961	768685	775069	668007	718142	628263
6.58333	0.66224	0.65395	0.65833	0.87715	0.76885	0.79979		771717	763668	771438	668878	713324	631633
6.66667	0.65531	0.65026	0.65305	0.87212	0.76595	0.80039		767101	761230	767911	666851	713608	627139
6.75	0.65533	0.64782	0.65186	0.86664	0.76164	0.79571		767120	759620	767116	664647	711396	625535
6.83333	0.64765	0.63937	0.64385	0.87278	0.75658	0.79137		762000	754034	761763	667118	709340	624927
6.91667	0.64678	0.63739	0.64245	0.86756	0.75312	0.78994		761427	752726	760822	665015	708667	621941
7	0.63008	0.63475	0.63279	0.86315	0.75146	0.78199		750301	750979	754386	663239	704903	619368
7.08333	0.63008	0.62444	0.62771	0.86139	0.74618	0.77654		750304	744168	750982	662533	702326	618005
7.16667	0.6267	0.6242	0.62471	0.86192	0.74423	0.77708		748049	744007	748975	662747	702582	616393
7.25	0.61865	0.61584	0.61657	0.85989	0.74591	0.78077		742692	738479	743532	661927	704328	613846
7.33333	0.61436	0.61432	0.61367	0.8507	0.73888	0.76789		739836	737477	741603	658228	698230	611764
7.41667	0.61436	0.61097	0.61202	0.84855	0.73135	0.7629		739832	735262	740494	657363	695869	612113
7.5	0.6043	0.60112	0.60214	0.84261	0.73095	0.75952		733138	728750	733891	654970	694273	610816
7.58333	0.60596	0.5996	0.60222	0.84425	0.72486	0.75414		734241	727749	733942	655631	691727	613979
7.66667	0.60136	0.59471	0.59751	0.84403	0.7239	0.75289		731178	724517	730794	655540	691132	609391
7.75	0.59647	0.5903	0.59289	0.83755	0.71647	0.74874		727921	721603	727709	652933	689169	605575
7.83333	0.59056	0.58903	0.58931	0.83081	0.72124	0.74653		723989	720764	725323	650217	688122	604310
7.91667	0.58141	0.57812	0.57936	0.83086	0.71421	0.74403		717891	713551	718668	650237	686940	603404
8	0.57173	0.57805	0.57448	0.83254	0.70359	0.7394		711446	713502	715420	650914	684750	598453
8.08333	0.56777	0.5735	0.57026	0.8279	0.70365	0.73237		708813	710497	712602	649045	681422	600381
8.16667	0.56725	0.56692	0.56676	0.82794	0.70728	0.73063		708463	706147	710251	649060	680601	597636
8.25	0.56559	0.5625	0.56375	0.82147	0.70201	0.7258		707362	703227	708241	646458	678314	596746
8.33333	0.56136	0.55789	0.55936	0.81592	0.69409	0.72383		704541	700181	705308	644222	677381	598873
8.41667	0.55671	0.55524	0.55573	0.81743	0.68937	0.71924		701450	698426	702884	644828	675211	592809
8.5	0.55628	0.54837	0.55213	0.81345	0.68654	0.71359		701163	693884	700470	643228	672539	589494
8.58333	0.546	0.55186	0.54871	0.81057	0.68986	0.71164		694317	696193	698202	642068	671616	592247
8.66667	0.54244	0.54134	0.54175	0.80602	0.68873	0.70769		691944	689242	693540	640235	669748	585936
8.75	0.54252	0.53762	0.53995	0.81213	0.67836	0.70962		691999	686777	692334	642697	670657	586268
8.83333	0.53702	0.53211	0.53448	0.80098	0.675	0.69789		688335	683136	688682	638207	665107	582545
8.91667	0.53475	0.53078	0.53269	0.79793	0.67134	0.69764		686824	682256	687487	636976	664990	581871
9	0.52718	0.52302	0.52508	0.79586	0.66375	0.69267		681782	677128	682402	636142	662639	580687
9.08333	0.52384	0.52383	0.52381	0.79208	0.6629	0.69035		679557	677665	681557	634621	661540	576668
9.16667	0.51937	0.51674	0.51809	0.79353	0.66086	0.68799		676584	672976	677727	635205	660423	576708
9.25	0.51909	0.50965	0.51445	0.78652	0.65428	0.68562		676395	668292	675290	632382	659304	576013
9.33333	0.51092	0.5106	0.51083	0.78431	0.65088	0.68455		670956	668919	672884	631493	658796	574836
9.41667	0.508	0.50709	0.50765	0.77947	0.65289	0.68004		669013	666600	670753	629546	656664	571019
9.5	0.50505	0.49965	0.50251	0.77898	0.64518	0.67037		667049	661685	667313	629345	652085	569139
9.58333	0.50139	0.49712	0.49942	0.7836	0.64447	0.67202		664607	660011	665255	631208	652865	568017
9.66667	0.49891	0.4935	0.4964	0.77542	0.64312	0.6681		662960	657620	663236	627912	651013	569192
9.75	0.48985	0.49343	0.49184	0.7718	0.63783	0.66005		656929	657569	660195	626455	647203	567379
9.83333	0.49273	0.48737	0.49029	0.76886	0.63115	0.65736		658847	653565	659152	625273	645929	566413
9.91667	0.48469	0.48718	0.48618	0.76397	0.62878	0.65496		653492	653438	656411	623301	644793	565162
10	0.48713	0.48636	0.487	0.76405	0.62636	0.64971		655117	652899	656954	623335	642309	562745
10.0833	0.47997	0.4776	0.4791	0.76138	0.62818	0.64893		650349	647105	651674	622258	641944	561504
10.1667	0.47508	0.47217	0.47398	0.75825	0.62671	0.64693		647090	643522	648252	621000	640994	560009
10.25	0.47172	0.47071	0.47157	0.75372	0.6168	0.64115		644855	642552	646650	619175	638260	558945
10.3333	0.46475	0.46924	0.46737	0.75299	0.61747	0.6384		640214	641585	643846	618881	636957	557179
10.4167	0.46551	0.46469	0.46551	0.74794	0.61561	0.63257		640721	638578	642596	616848	634199	558688
10.5	0.46282	0.46137	0.46252	0.74384	0.60975	0.63371		638925	636378	640598	615195	634738	553509
10.5833	0.46416	0.45647	0.46078	0.7437	0.60995	0.62245		639819	633140	639426	615138	629410	552876
10.6667	0.4586	0.45464	0.4571	0.73532	0.60205	0.62209		636120	631931	636972	611765	629241	551667
10.75	0.45599	0.45326	0.45511	0.73396	0.60011	0.62617		634376	631021	635645	611218	631174	551268
10.8333	0.44811	0.4501	0.44962	0.73724	0.59541	0.617		629133	628933	631980	612537	626833	549835
10.9167	0.44527	0.44617	0.44626	0.73063	0.59225	0.61531		627239	626334	629733	609877	626033	554429
11	0.44117	0.44085	0.44159	0.74823	0.58981	0.61386		624512	622820	626612	616962	625345	547944
11.0833	0.44048	0.44226	0.44009	0.73055	0.587	0.60954		624053	623751	625612	609846	623304	544106
11.1667	0.43882	0.43875	0.43753	0.72725	0.58509	0.60183		622949	621429	623900	608517	619655	544458
11.25	0.43547	0.43563	0.43432	0.72456	0.58714	0.60389		620713	619368	621751	607433	620629	542950
11.3333	0.43162	0.4326	0.4309	0.72015	0.58722	0.60224		618149	617368	619469	605655	619848	541784
11.4167	0.42641	0.43189	0.42794	0.71527	0.5846	0.59827		614680	616896	617499	603692	617972	539943
11.5	0.42876	0.42896	0.42767	0.71584	0.5765	0.59756		616245	614957	617312	603921	617635	542851
11.5833	0.42616	0.42464	0.42425	0.71604	0.57396	0.59307		614517	612103	615020	604001	615511	540809
11.6667	0.41663	0.42576	0.42003	0.70526	0.56794	0.5958		608167	612842	612215	599662	616800	536633
11.75	0.41803	0.4241	0.41992	0.70799	0.57084	0.58825		609104	611748	612136	600759	613229	537782
11.8333	0.41722	0.4185	0.41675	0.70659	0.56829	0.58158		608561	608045	610013	600198	610071	539082
11.9167	0.41613	0.41771	0.41582	0.69678	0.55836	0.57674		607837	607521	609389	596245	607785	533950
12	0.40779	0.41525	0.41043	0.70087	0.55892	0.5779		602286	605895	605801	597892	608332	532246
12.0833	0.40907	0.40694	0.40698	0.70056	0.56339	0.57729		603136	600402	603480	597770	608045	528995
12.1667	0.40432	0.40666	0.40447	0.69647	0.55547	0.57195		599973	600221	601808	596122	605516	529425
12.25	0.40503	0.40509	0.40405	0.69596	0.54961	0.56968		600446	599179	601523	595916	604444	526517
12.3333	0.40396	0.40503	0.40348	0.69002	0.55282	0.56676		599731	599143	601148	593523	603058	526866
12.4167	0.39767	0.4021	0.39889	0.68787	0.54428	0.56516		595542	597207	598085	592657	602302	526941
12.5	0.40099	0.3991	0.39908	0.68974	0.54472	0.56016		597757	595221	598199	593412	599937	524558
12.5833	0.39344	0.39623	0.39388	0.68292	0.53837	0.55763		592727	593322	594735	590667	598742	523533
12.6667	0.39374	0.39346	0.39267	0.67875	0.53826	0.55603		592930	591494	593922	588985	597982	520851
12.75	0.39138	0.38953	0.38955	0.6796	0.53562	0.55532		591354	588899	591837	589327	597645	521160
12.8333	0.38407	0.38997	0.38612	0.676	0.53266	0.55185		586491	589187	589549	587880	596007	520692
12.9167	0.38225	0.38415	0.38234	0.67443	0.53657	0.54899		585276	585340	587019	587248	594654	518436
13	0.37959	0.38371	0.38079	0.67094	0.53109	0.54327		583508	585053	585991	585842	591948	516352
13.0833	0.37926	0.38361	0.38057	0.67062	0.52927	0.54272		583284	584980	585843	585712	591683	516545
13.1667	0.3784	0.38152	0.37912	0.66664	0.52345	0.54342		582713	583602	584868	584110	592015	516129
13.25	0.37474	0.37945	0.37627	0.66234	0.52382	0.53679		580273	582236	582965	582377	588880	513609
13.3333	0.37208	0.38014	0.37528	0.66662	0.52111	0.53624		578508	582689	582309	584101	588619	512454
13.4167	0.36677	0.37593	0.37055	0.6608	0.52034	0.53454		574967	579910	579149	581759	587816	513897
13.5	0.36695	0.37075	0.36716	0.65708	0.51566	0.52734		575086	576485	576875	580261	584408	510112
13.5833	0.36526	0.37057	0.36622	0.65599	0.51418	0.52683		573966	576362	576253	579822	584167	510707
13.6667	0.36647	0.37006	0.36658	0.6533	0.51111	0.5238		574771	576027	576488	578736	582734	510001
13.75	0.35847	0.3701	0.3626	0.655	0.50888	0.52338		569445	576053	573838	579423	582532	509585
13.8333	0.36073	0.36507	0.36124	0.65029	0.50389	0.52206		570945	572728	572926	577523	581907	505209
13.9167	0.35817	0.36643	0.36064	0.64699	0.50121	0.51825		569241	573631	572525	576195	580106	507644
14	0.35281	0.36054	0.35505	0.64529	0.49766	0.51589		565673	569732	568792	575513	578990	504202
14.0833	0.35669	0.35874	0.35611	0.63807	0.49553	0.51407		568258	568542	569489	572604	578129	505560
14.1667	0.34838	0.35995	0.35254	0.64104	0.49669	0.50955		562722	569342	567121	573801	575992	503087
14.25	0.34788	0.36052	0.35258	0.63462	0.49843	0.5145		562389	569721	567144	571216	578330	500036
14.3333	0.34954	0.3555	0.35094	0.63306	0.49546	0.50599		563495	566405	566039	570586	574306	501319
14.4167	0.34368	0.35113	0.34585	0.63049	0.49166	0.50327		559596	563515	562645	569551	573016	501438
14.5	0.34295	0.35007	0.34496	0.62807	0.48633	0.49848		559105	562814	562048	568578	570750	499582
14.5833	0.34465	0.3472	0.3444	0.6327	0.48847	0.4999		560237	560914	561665	570441	571421	497717
14.6667	0.34051	0.34884	0.34314	0.62959	0.48574	0.50322		557484	562001	560832	569190	572996	496851
14.75	0.3399	0.34365	0.34027	0.62272	0.4799	0.49352		557079	558569	558913	566422	568406	496110
14.8333	0.34025	0.34371	0.34048	0.62617	0.48148	0.49724		557312	558611	559050	567811	570163	496020
14.9167	0.3338	0.34337	0.33709	0.6213	0.47509	0.49198		553014	558386	556789	565853	567678	497368
15	0.33596	0.33756	0.3353	0.616	0.4695	0.48915		554451	554548	555588	563717	566335	495444
15.0833	0.33126	0.3371	0.33273	0.6203	0.46946	0.49473		551325	554243	553873	565450	568977	496654
15.1667	0.32693	0.33703	0.33053	0.60769	0.46803	0.48719		548441	554195	552407	560371	565410	493947
15.25	0.32636	0.33696	0.33021	0.61363	0.4674	0.48514		548060	554151	552194	562764	564441	490333
15.3333	0.32903	0.33309	0.32963	0.60921	0.46428	0.48745		549835	551591	551802	560982	565534	488563
15.4167	0.32395	0.33	0.32557	0.60574	0.46264	0.47977		546453	549549	549090	559588	561899	488700
15.5	0.32397	0.33213	0.32663	0.60398	0.46309	0.47698		546468	550958	549802	558877	560578	488234
15.5833	0.32036	0.32996	0.32376	0.60435	0.46227	0.47239		544062	549521	547881	559026	558408	487215
15.6667	0.31978	0.32696	0.32199	0.60407	0.45958	0.47221		543678	547541	546699	558913	558320	485996
15.75	0.31802	0.32464	0.31997	0.59987	0.45655	0.47266		542506	546007	545345	557222	558534	485447
15.8333	0.31622	0.32564	0.31956	0.59845	0.45632	0.47095		541311	546664	545076	556650	557723	485007
15.9167	0.31279	0.32497	0.31751	0.593	0.44874	0.46594		539022	546223	543711	554457	555356	486582
16	0.31345	0.32117	0.31597	0.59448	0.44616	0.46427		539465	543714	542679	555053	554562	483324
16.0833	0.31246	0.32224	0.316	0.59474	0.44344	0.46683		538807	544418	542702	555158	555778	482021
16.1667	0.30855	0.32463	0.31523	0.59241	0.4419	0.46081		536204	545999	542190	554219	552927	482061
16.25	0.30901	0.31949	0.31292	0.58905	0.44301	0.45531		536509	542599	540643	552867	550323	481904
16.3333	0.3062	0.3161	0.30985	0.58407	0.43814	0.45514		534633	540362	538586	550858	550242	480683
16.4167	0.30824	0.31434	0.31	0.58164	0.43783	0.451		535995	539195	538684	549883	548286	480965
16.5	0.30271	0.31447	0.3073	0.58022	0.4374	0.45127		532312	539283	536886	549309	548412	479154
16.5833	0.29802	0.31296	0.30396	0.57605	0.43649	0.44868		529189	538286	534659	547629	547187	477567
16.6667	0.2989	0.31188	0.30387	0.57574	0.44019	0.44707		529777	537574	534597	547505	546427	477000
16.75	0.29397	0.31107	0.301	0.57007	0.43398	0.44669		526495	537036	532687	545222	546244	476056
16.8333	0.29561	0.30778	0.3002	0.57324	0.4292	0.44228		527582	534864	532145	546499	544158	475250
16.9167	0.29415	0.30722	0.2992	0.56953	0.4294	0.44612		526615	534491	531474	545004	545976	474637
17	0.28958	0.30515	0.29589	0.57011	0.4261	0.44221		523569	533122	529267	545239	544128	473380
17.0833	0.28838	0.30504	0.29524	0.56543	0.42548	0.44013		522773	533050	528833	543352	543142	473054
17.1667	0.2884	0.30486	0.29516	0.56868	0.42397	0.436		522785	532934	528781	544663	541188	476978
17.25	0.28581	0.3009	0.29191	0.56171	0.42783	0.43694		521060	530312	526607	541855	541630	470402
17.3333	0.27772	0.29984	0.28735	0.56347	0.42523	0.43086		515672	529615	523565	542563	538754	471071
17.4167	0.27576	0.30078	0.28683	0.56165	0.4243	0.43148		514367	530234	523222	541832	539050	469814
17.5	0.27493	0.29811	0.2851	0.56101	0.41724	0.43185		513813	528469	522063	541575	539222	468323
17.5833	0.27263	0.29654	0.28317	0.55568	0.41319	0.43684		512281	527432	520778	539427	541586	470543
17.6667	0.2737	0.29447	0.28269	0.55626	0.41355	0.42581		512994	526063	520450	539660	536364	468709
17.75	0.26974	0.29675	0.28183	0.55341	0.41142	0.42397		510356	527574	519886	538514	535495	472775
17.8333	0.2687	0.2928	0.27936	0.55183	0.41093	0.41989		509663	524960	518233	537877	533563	469256
17.9167	0.2647	0.29353	0.27772	0.55074	0.41033	0.42071		506999	525442	517142	537436	533950	468084
18	0.26574	0.29153	0.27726	0.54895	0.40729	0.42138		507695	524121	516829	536716	534269	466541
18.0833	0.26179	0.29233	0.27568	0.55027	0.40565	0.41909		505062	524649	515777	537249	533188	463880
18.1667	0.26081	0.28944	0.27376	0.54309	0.40392	0.41606		504415	522737	514497	534358	531753	464124
18.25	0.25676	0.28906	0.27155	0.54542	0.40057	0.41452		501715	522491	513024	535297	531023	464122
18.3333	0.25807	0.28942	0.27238	0.54142	0.40047	0.41371		502587	522726	513578	533685	530642	463648
18.4167	0.25606	0.28618	0.26978	0.53825	0.39626	0.41214		501246	520582	511835	532408	529895	462385
18.5	0.25317	0.28582	0.26816	0.53791	0.39949	0.40898		499323	520348	510757	532272	528400	465317
18.5833	0.25084	0.2884	0.26827	0.53953	0.39849	0.40767		497773	522054	510835	532922	527781	461210
18.6667	0.2483	0.28406	0.26485	0.53548	0.39147	0.40367		496079	519181	508552	531295	525889	460258
18.75	0.25421	0.28605	0.26879	0.53613	0.39045	0.40183		500020	520498	511180	531556	525019	458973
18.8333	0.25244	0.28392	0.26686	0.53284	0.3897	0.40156		498837	519090	509885	530231	524889	458436
18.9167	0.24816	0.28171	0.26363	0.53272	0.38799	0.40313		495986	517629	507729	530180	525635	459313
19	0.25211	0.28054	0.26503	0.52706	0.39074	0.40054		498621	516857	508661	527902	524407	457321
19.0833	0.247	0.278	0.26122	0.53023	0.38761	0.39962		495218	515177	506119	529178	523971	455824
19.1667	0.24747	0.28181	0.26333	0.52781	0.38507	0.39609		495526	517694	507532	528207	522303	455245
19.25	0.24589	0.27833	0.26083	0.52725	0.38611	0.39238		494478	515398	505859	527978	520546	455314
19.3333	0.24907	0.27888	0.26269	0.52569	0.38088	0.39221		496593	515757	507096	527352	520467	455304
19.4167	0.24133	0.27443	0.25663	0.52181	0.37923	0.39037		491442	512817	503051	525790	519596	453520
19.5	0.24391	0.2748	0.2581	0.52549	0.37781	0.38991		493158	513062	504031	527270	519379	455802
19.5833	0.24453	0.27468	0.25835	0.51643	0.37357	0.38685		493569	512985	504199	523623	517932	453299
19.6667	0.24292	0.27198	0.25621	0.51698	0.37463	0.39058		492495	511199	502768	523843	519696	452999
19.75	0.24046	0.27342	0.2557	0.51718	0.37308	0.38708		490862	512153	502429	523925	518041	451721
19.8333	0.23989	0.27136	0.25439	0.51186	0.373	0.385		490479	510792	501557	521781	517054	452324
19.9167	0.24195	0.2704	0.25495	0.51128	0.3712	0.38295		491852	510152	501924	521547	516083	455613
20	0.23985	0.27085	0.25412	0.50958	0.36698	0.38117		490455	510451	501374	520862	515242	451238
20.0833	0.23695	0.26966	0.25209	0.51461	0.36781	0.381		488526	509668	500019	522888	515162	449542
20.1667	0.08006	0.082	0.08115	0.10945	0.13914	0.11202		384054	385627	385762	359740	387887	342304
20.25	0.06819	0.06609	0.06738	0.08626	0.10399	0.08885		376148	375111	376551	350400	376924	336337
20.3333	0.05817	0.05653	0.05765	0.07316	0.08251	0.07132		369476	368790	370054	345126	368629	327343
20.4167	0.05032	0.05032	0.05067	0.0613	0.06874	0.05771		364248	364687	365389	340349	362187	322631
20.5	0.0441	0.04084	0.04288	0.05203	0.05298	0.0498		360106	358420	360184	336617	358444	318705
20.5833	0.0388	0.0375	0.03859	0.05047	0.04447	0.04367		356575	356211	357314	335988	355545	317190
20.6667	0.03606	0.03501	0.03599	0.04395	0.03689	0.03644		354753	354565	355580	333364	352121	313993
20.75	0.03231	0.02982	0.03156	0.04077	0.03057	0.03688		352259	351137	352620	332082	352331	315332
20.8333	0.0266	0.02594	0.02679	0.03909	0.02643	0.02982		348452	348576	349435	331406	348989	312514
20.9167	0.0269	0.02022	0.02412	0.0334	0.02481	0.02749		348653	344792	347644	329116	347887	310609
21	0.02651	0.01942	0.02354	0.02952	0.01933	0.02561		348396	344262	347251	327551	347001	312239
21.0833	0.01913	0.01695	0.01863	0.02751	0.01556	0.02672		343481	342634	343979	326744	347524	309749
21.1667	0.01781	0.0139	0.01647	0.02906	0.01259	0.02765		342600	340618	342530	327369	347964	308689
21.25	0.01681	0.01217	0.01511	0.02814	0.0138	0.01864		341934	339474	341625	326995	343700	308296
21.3333	0.01692	0.01093	0.01385	0.02707	0.01254	0.01746		342007	338652	340776	326566	343144	308197
21.4167	0.013	0.00934	0.0111	0.02068	0.00927	0.01524		339398	337599	338945	323991	342091	307436
21.5	0.0119	0.00917	0.01047	0.01734	0.00767	0.01447		338668	337489	338525	322647	341726	305975
21.5833	0.00921	0.00617	0.00764	0.01658	0.00491	0.01181		336873	335506	336635	322343	340467	304947
21.6667	0.00809	0.00463	0.00633	0.01352	0.00695	0.00839		336131	334489	335756	321111	338852	306270
21.75	0.00831	0.00505	0.00664	0.01327	0.00789	0.00857		336276	334763	335965	321008	338934	304361
21.8333	0.00947	0.00342	0.00642	0.01235	0.0042	0.00899		337049	333691	335816	320638	339134	303956
21.9167	0.00685	0.00182	0.00432	0.00967	0.00256	0.00719		335300	332628	334410	319559	338284	302480
22	0.00804	0.00367	0.00583	0.00913	0.000983343	0.00483		336098	333855	335423	319341	337163	303213
22.0833	0.00631	0.000644505	0.00347	0.00561	0	0.00477		334944	331853	333844	317923	337135	302851
22.1667	0.00485	0.000534772	0.00269	0.01236	0.0016	0.00394		333969	331781	333321	320640	336745	302215
22.25	0.00243	0	0.00122	0.00435	0.00213	0.00109		332361	331427	332340	317418	335397	301411
22.3333	0.00613	0.00107	0.00359	0.0031	0.00175	0.00182		334821	332134	333923	316915	335740	301483
22.4167	0.00166	0.00231	0.00197	0.00536	0.00189	0.0023		331846	332952	332845	317823	335968	302087
22.5	0	0.000351347	0.000173159	0	0.000340792	0		330742	331659	331647	315665	334880	301590
--					--
--					--
--					--
--					--
--					--
--					--
--					--
--					--
--					--
--					--
--					--
--					--
--					--
--					--
--					--
--					--
--					--
--					--
--					--
--					--
--					--
--					--
--					--
--					--
--					--
--					--
--					--
--					--
--					--
--					--
--					--
--					--
--					--
--					--
--					--
--					--
--					--
--					--
--					--
--					--
--					--
--					--
--					--
--					--
--					--
--					--
--					--
--					--
--					--
--					--
--					--
--					--
--					--
--					--
--					--
--					--
--					--
--					--
--					--
--					--
--					--
--					--
--					--
--					--
--					--
--					--
--					--
--					--
--					--
--					--
--					--
--					--
--					--
--					--
--					--
--					--
--					--
--					--
--					--
--					--
--					--
--					--
--					--
--					--
--					--
--					--
--					--
--					--
--					--
--					--
--					--
--					--
--					--
--					--
--					--
--					--
--					--
--					--
--					--
--					--
--					--
--					--
--					--
--					--
--					--
--					--
--					--
--					--
--					--
--					--
--					--
--					--
--					--
--					--
--					--
--					--
--					--
--					--
--					--
--					--
--					--
--					--
--					--
--					--
--					--
--					--
--					--
--					--
--					--
--					--
--					--
--					--
--					--
--					--
--					--
--					--
--					--
--					--
--					--
--					--
--					--
--					--
--					--
--					--
--					--
--					--
--					--
--					--
--					--
--					--
--					--
--					--
--					--
--					--
--					--
--					--
--					--
--					--
--					--
--					--
--					--
--					--
--					--
--					--
--					--
--					--
--					--
--					--
--					--
--					--
--					--
--					--
--					--
--					--
--					--
--					--
--					--
--					--
--					--
--					--
--					--
--					--
--					--
--					--
--					--
--					--
--					--
--					--
--					--
--					--
--					--
--					--
--					--
--					--
--					--
--					--
--					--
--					--
--					--
--					--
--					--
--					--
--					--
--					--
--					--
--					--
--					--
--					--
--					--
--					--
--					--
--					--
--					--
--					--
--					--
--					--
--					--
--					--
--					--
--					--
--					--
--					--

## Sheet: fig5a,b+figS11
RAW DATA
	wt-Na-1	wt-Na-2		wt-Na-3	wt-Rb-3		wt-Rb-1	wt-Rb-2		pBAD-Na-1	pBAD-Na-2		pBAD-Na-3	pBAD-Rb-3		pBAD-Rb-1	pBAD-Rb-2		E233A-Na-1	E233A-Na-2		E233A-Na-3	E233A-Rb-3		E233A-Rb-1	E233A-Rb-2		D36A-Na-1	D36A-Na-2		D36A-Na-3	D36A-Rb-3		D36A-Rb-1	D36A-Rb-2
t	[KCl] (µM)	[KCl] (µM)	t	[KCl] (µM)	[KCl] (µM)	t	[KCl] (µM)	[KCl] (µM)	t	[KCl] (µM)	[KCl] (µM)	t	[KCl] (µM)	[KCl] (µM)	t	[KCl] (µM)	[KCl] (µM)	t	[KCl] (µM)	[KCl] (µM)	t	[KCl] (µM)	[KCl] (µM)	t	[KCl] (µM)	[KCl] (µM)	t	[KCl] (µM)	[KCl] (µM)	t	[KCl] (µM)	[KCl] (µM)	t	[KCl] (µM)	[KCl] (µM)
0.93	200	208	0.96	192	232	0.85	224	224	0.91	352	352	0.88	344	320	0.83	368	352	0.93	168	156	0.93	152	160	0.85	196	180	0.95	268	272	0.8	272	300	0.86	308	304
1.78	192	208	1.86	192	216	1.7	208	208	1.7	352	352	1.8	344	320	1.63	360	360	1.76	168	168	1.76	148	144	1.66	184	168	1.78	268	268	1.63	280	296	1.7	304	308
3.36	192	208	3.51	184	200	3.28	184	192	3.31	344	352	3.43	344	336	3.26	352	352	3.31	160	164	3.45	144	132	3.26	172	152	3.45	272	272	3.28	280	296	3.36	304	304
5.11	184	192	4.81	184	184	5.03	168	176	4.76	344	344	4.73	336	312	4.66	352	344	4.76	160	160	4.76	144	128	4.66	164	144	4.76	264	264	4.6	268	292	4.46	300	304
7.45	184	192	7.15	176	160	7.36	152	152	7.41	336	336	7.06	328	304	7.33	344	336	7.31	156	156	7.28	136	120	7.26	156	132	7.28	260	264	7.2	272	288	7.2	296	296
9.95	176	184	9.95	168	144	9.86	136	136	9.95	328	336	9.86	328	312	9.86	336	328	9.95	160	156	9.95	136	108	9.86	144	120	9.95	256	256	9.86	268	284	9.86	288	292
14.95	168	176	14.95	160	120	14.86	112	112	14.95	320	328	14.86	320	304	14.86	328	320	14.95	144	148	14.95	128	92	14.86	120	108	14.95	248	252	14.86	264	284	14.86	284	280
19.95	168	168	19.95	152	104	19.86	88	88	19.95	312	328	19.86	312	304	19.86	320	320	19.95	140	148	19.95	128	76	19.86	104	92	19.95	240	244	19.86	256	276	19.86	276	272
NORMALIZED DATA
	shown in paper						shown in paper			shown in paper						shown in paper						shown in paper				shown in paper			shown in paper						shown in paper
	wt-Na-1	wt-Na-2		wt-Na-3	wt-Rb-3		wt-Rb-1	wt-Rb-2		pBAD-Na-1	pBAD-Na-2		pBAD-Na-3	pBAD-Rb-3		pBAD-Rb-1	pBAD-Rb-2		E233A-Na-1	E233A-Na-2		E233A-Na-3	E233A-Rb-3		E233A-Rb-1	E233A-Rb-2		D36A-Na-1	D36A-Na-2		D36A-Na-3	D36A-Rb-3		D36A-Rb-1	D36A-Rb-2
t	[KCl] (µM)	[KCl] (µM)	t	[KCl] (µM)	[KCl] (µM)	t	[KCl] (µM)	[KCl] (µM)	t	[KCl] (µM)	[KCl] (µM)	t	[KCl] (µM)	[KCl] (µM)	t	[KCl] (µM)	[KCl] (µM)	t	[KCl] (µM)	[KCl] (µM)	t	[KCl] (µM)	[KCl] (µM)	t	[KCl] (µM)	[KCl] (µM)	t	[KCl] (µM)	[KCl] (µM)	t	[KCl] (µM)	[KCl] (µM)	t	[KCl] (µM)	[KCl] (µM)
0.93	1	1	0.96	1	1	0.85	1	1	0.91	1	1	0.88	1	0.95238	0.83	1	0.97778	0.93	1	0.92857	0.93	1	1	0.85	1	1	0.95	0.98529	1	0.8	0.97143	1	0.86	1	0.98701
1.78	0.96	1	1.86	1	0.93103	1.7	0.92857	0.92857	1.7	1	1	1.8	1	0.95238	1.63	0.97826	1	1.76	1	1	1.76	0.97368	0.9	1.66	0.93878	0.93333	1.78	0.98529	0.98529	1.63	1	0.98667	1.7	0.98701	1
3.36	0.96	1	3.51	0.95833	0.86207	3.28	0.82143	0.85714	3.31	0.97727	1	3.43	1	1	3.26	0.95652	0.97778	3.31	0.95238	0.97619	3.45	0.94737	0.825	3.26	0.87755	0.84444	3.45	1	1	3.28	1	0.98667	3.36	0.98701	0.98701
5.11	0.92	0.92308	4.81	0.95833	0.7931	5.03	0.75	0.78571	4.76	0.97727	0.97727	4.73	0.97674	0.92857	4.66	0.95652	0.95556	4.76	0.95238	0.95238	4.76	0.94737	0.8	4.66	0.83673	0.8	4.76	0.97059	0.97059	4.6	0.95714	0.97333	4.46	0.97403	0.98701
7.45	0.92	0.92308	7.15	0.91667	0.68966	7.36	0.67857	0.67857	7.41	0.95455	0.95455	7.06	0.95349	0.90476	7.33	0.93478	0.93333	7.31	0.92857	0.92857	7.28	0.89474	0.75	7.26	0.79592	0.73333	7.28	0.95588	0.97059	7.2	0.97143	0.96	7.2	0.96104	0.96104
9.95	0.88	0.88462	9.95	0.875	0.62069	9.86	0.60714	0.60714	9.95	0.93182	0.95455	9.86	0.95349	0.92857	9.86	0.91304	0.91111	9.95	0.95238	0.92857	9.95	0.89474	0.675	9.86	0.73469	0.66667	9.95	0.94118	0.94118	9.86	0.95714	0.94667	9.86	0.93506	0.94805
14.95	0.84	0.84615	14.95	0.83333	0.51724	14.86	0.5	0.5	14.95	0.90909	0.93182	14.86	0.93023	0.90476	14.86	0.8913	0.88889	14.95	0.85714	0.88095	14.95	0.84211	0.575	14.86	0.61224	0.6	14.95	0.91176	0.92647	14.86	0.94286	0.94667	14.86	0.92208	0.90909
19.95	0.84	0.80769	19.95	0.79167	0.44828	19.86	0.39286	0.39286	19.95	0.88636	0.93182	19.86	0.90698	0.90476	19.86	0.86957	0.88889	19.95	0.83333	0.88095	19.95	0.84211	0.475	19.86	0.53061	0.51111	19.95	0.88235	0.89706	19.86	0.91429	0.92	19.86	0.8961	0.88312
Inititial rates
				shown in paper	shown in paper
	initial rate 1st repetition (µM/min)	initial rate 2nd repetition (µM/min)	initial rate 3rd repetition (µM/min)	initial rate (mean) (µM/min)	initial rate (standard deviation) (µM/min)
WT-Rb	11.983	11.0887	11.983	11.6849	0.51628
WT-Na	2.3062	2.89301	2.19049	2.46323	0.37667
E233A-Rb	10.5221	8.11239	9.36688	9.33378	1.20518
E233A-Na	1.44372	0.86997	1.26216	1.19195	0.29325
D36A-Rb	1.14	1.6563	1.9038	1.5667	0.3897
D36A-Na	1.60169	1.45441	1.0422	1.3661	0.29001
pBAD-Rb	2.35493	2.14418	1.77483	2.09131	0.29364
pBAD-Na	2.51375	2.60572	1.76315	2.29421	0.4622

## Sheet: fig5c,d
KimA-wt						D117A
1st repetition (shown in the paper)						1st repetition (shown in the paper)
	0,3 mM KCl	3 mM KCl	30 mM KCl	115 mM KCl			0,3 mM KCl	3 mM KCl	30 mM KCl	115 mM KCl
t (hours)	OD (600nm)	OD (600nm)	OD (600nm)	OD (600nm)		t (hours)	OD (600nm)	OD (600nm)	OD (600nm)	OD (600nm)
0	0.23	0.26	0.29	0.29		0	0.31	0.29	0.28	0.28
1	0.32	0.3	0.36	0.34		1	0.41	0.44	0.4	0.35
2	0.42	0.43	0.46	0.43		2	0.55	0.48	0.45	0.38
3	0.5	0.5	0.6	0.51		3	0.79	0.74	0.56	0.45
4	0.57	0.61	0.65	0.62		4	1.02	0.93	0.66	0.46
5	0.63	0.68	0.76	0.81		5	1.38	1.16	0.76	0.48
6	0.68	0.75	0.84	0.94		6	1.62	1.44	0.86	0.52
7	0.77	0.84	1.02	1.15		7	1.87	1.7	1	0.55
8	0.84	0.91	1.16	1.51		8	2.1	2	1.18	0.58
2nd repetition						2nd repetition
	0,3 mM KCl	3 mM KCl	30 mM KCl	115 mM KCl			0,3 mM KCl	3 mM KCl	30 mM KCl	115 mM KCl
t (hours)	OD (600nm)	OD (600nm)	OD (600nm)	OD (600nm)		t (hours)	OD (600nm)	OD (600nm)	OD (600nm)	OD (600nm)
0	0.3	0.29	0.27	0.29		0	0.25	0.29	0.29	0.28
1	0.34	0.39	0.36	0.37		1	0.38	0.43	0.39	0.34
2	0.47	0.43	0.44	0.45		2	0.5	0.54	0.46	0.37
3	0.52	0.53	0.55	0.55		3	0.73	0.75	0.54	0.43
4	0.61	0.6	0.59	0.63		4	0.91	0.85	0.65	0.43
5	0.66	0.76	0.79	0.77		5	1.28	1.26	0.81	0.45
6	0.7	0.78	0.82	0.93		6	1.53	1.48	0.85	0.48
7	0.76	0.85	0.88	1.2		7	1.78	1.75	0.94	0.5
8	0.81	1	1.07	1.53		8	2	1.95	1.05	0.56
3rd repetition						3rd repetition
	0,3 mM KCl	3 mM KCl	30 mM KCl	115 mM KCl			0,3 mM KCl	3 mM KCl	30 mM KCl	115 mM KCl
t (hours)	OD (600nm)	OD (600nm)	OD (600nm)	OD (600nm)		t (hours)	OD (600nm)	OD (600nm)	OD (600nm)	OD (600nm)
0	0.28	0.25	0.31	0.3		0	0.32	0.28	0.28	0.27
1	0.38	0.34	0.4	0.34		1	0.48	0.42	0.39	0.34
2	0.43	0.42	0.49	0.41		2	0.6	0.54	0.43	0.36
3	0.56	0.51	0.6	0.54		3	0.77	0.67	0.53	0.42
4	0.6	0.58	0.64	0.62		4	1	0.91	0.66	0.42
5	0.65	0.66	0.8	0.73		5	1.39	1.23	0.77	0.45
6	0.7	0.74	0.88	0.9		6	1.54	1.46	0.81	0.46
7	0.74	0.82	0.92	1.15		7	1.76	1.7	0.9	0.49
8	0.95	0.98	1.1	1.51		8	1.97	1.88	0.95	0.52

## Sheet: figS9
KimA-wt
	0,01 mM KCl	0,02 mM KCl	0,03 mM KCl	0,05 mM KCl	0,1 mM KCl	0,2 mM KCl	0,5 mM KCl	1 mM KCl	3 mM KCl	10 mM KCl
t (hours)	OD (600nm)	OD (600nm)	OD (600nm)	OD (600nm)	OD (600nm)	OD (600nm)	OD (600nm)	OD (600nm)	OD (600nm)	OD (600nm)		[KCl] (mM)	growth rate (1/Hour)
0	0.15	0.19	0.17	0.18	0.2	0.18	0.2	0.18	0.16	0.17		0.01	0
1.1	0.16	0.19	0.16	0.21	0.22	0.18	0.18	0.16	0.17	0.19		0.02	0.0009
1.91	0.21	0.23	0.2	0.21	0.25	0.23	0.24	0.22	0.22	0.22		0.03	0.0092
3	0.22	0.23	0.24	0.27	0.28	0.26	0.26	0.25	0.25	0.26		0.05	0.0213
4	0.22	0.25	0.25	0.28	0.32	0.32	0.32	0.32	0.31	0.33		0.1	0.0337
5	0.2	0.25	0.24	0.27	0.34	0.33	0.37	0.4	0.34	0.38		0.2	0.0556
6	0.19	0.22	0.28	0.29	0.36	0.43	0.4	0.44	0.41	0.44		0.5	0.0555
7	0.22	0.24	0.31	0.33	0.41	0.45	0.47	0.5	0.44	0.56		1	0.0604
8.16	0.2	0.23	0.25	0.35	0.42	0.52	0.57	0.57	0.61	0.59		3	0.0602
9	0.22	0.24	0.27	0.38	0.5	0.6	0.61	0.62	0.58	0.72
10	0.2	0.25	0.3	0.4	0.53	0.69	0.67	0.71	0.71	0.79
D36A
	0,01 mM KCl	0,02 mM KCl	0,03 mM KCl	0,05 mM KCl	0,1 mM KCl	0,2 mM KCl	0,5 mM KCl	1 mM KCl	3 mM KCl	10 mM KCl
t (hours)	OD (600nm)	OD (600nm)	OD (600nm)	OD (600nm)	OD (600nm)	OD (600nm)	OD (600nm)	OD (600nm)	OD (600nm)	OD (600nm)
0	0.19	0.2	0.19	0.19	0.18	0.18	0.18	0.18	0.21	0.18
1.1	0.19	0.22	0.18	0.2	0.17	0.19	0.24	0.2	0.22	0.24
1.91	0.24	0.24	0.22	0.23	0.21	0.21	0.25	0.24	0.27	0.25
3	0.22	0.23	0.2	0.2	0.21	0.24	0.25	0.23	0.27	0.27
4	0.26	0.3	0.23	0.25	0.23	0.25	0.25	0.33	0.33	0.31
5	0.22	0.23	0.21	0.2	0.2	0.21	0.24	0.25	0.31	0.32
6	0.21	0.24	0.22	0.22	0.2	0.23	0.23	0.26	0.32	0.32
7	0.21	0.24	0.2	0.21	0.2	0.22	0.23	0.26	0.33	0.35
8.16	0.19	0.21	0.19	0.2	0.22	0.21	0.23	0.22	0.3	0.3
9	0.23	0.25	0.2	0.22	0.24	0.23	0.23	0.27	0.31	0.31
10	0.24	0.24	0.24	0.22	0.23	0.24	0.26	0.28	0.31	0.33
D36N
	0,01 mM KCl	0,02 mM KCl	0,03 mM KCl	0,05 mM KCl	0,1 mM KCl	0,2 mM KCl	0,5 mM KCl	1 mM KCl	3 mM KCl	10 mM KCl
t (hours)	OD (600nm)	OD (600nm)	OD (600nm)	OD (600nm)	OD (600nm)	OD (600nm)	OD (600nm)	OD (600nm)	OD (600nm)	OD (600nm)
0	0.2	0.2	0.2	0.21	0.2	0.2	0.2	0.2	0.22	0.19
1	0.22	0.23	0.22	0.23	0.24	0.22	0.22	0.27	0.28	0.22
2	0.25	0.24	0.23	0.24	0.27	0.25	0.28	0.3	0.31	0.27
3	0.23	0.25	0.23	0.23	0.27	0.27	0.27	0.3	0.3	0.3
4	0.25	0.23	0.22	0.25	0.27	0.25	0.27	0.32	0.34	0.26
5	0.24	0.24	0.26	0.24	0.25	0.29	0.29	0.33	0.33	0.34
6	0.26	0.26	0.26	0.27	0.28	0.29	0.32	0.37	0.35	0.32
7	0.24	0.25	0.25	0.24	0.28	0.28	0.33	0.39	0.36	0.33
8	0.26	0.23	0.24	0.24	0.29	0.27	0.32	0.36	0.39	0.34
9	0.26	0.23	0.25	0.25	0.27	0.27	0.31	0.37	0.41	0.35
10	0.27	0.24	0.28	0.26	0.28	0.29	0.33	0.41	0.4	0.36
Y43A
	0,01 mM KCl	0,02 mM KCl	0,03 mM KCl	0,05 mM KCl	0,1 mM KCl	0,2 mM KCl	0,5 mM KCl	1 mM KCl	3 mM KCl	10 mM KCl
t (hours)	OD (600nm)	OD (600nm)	OD (600nm)	OD (600nm)	OD (600nm)	OD (600nm)	OD (600nm)	OD (600nm)	OD (600nm)	OD (600nm)
0	0.19	0.18	0.27	0.21	0.19	0.18	0.26	0.23	0.28	0.19
1	0.23	0.22	0.27	0.22	0.22	0.21	0.23	0.24	0.31	0.23
2	0.23	0.21	0.29	0.22	0.22	0.21	0.22	0.28	0.36	0.31
3	0.23	0.22	0.3	0.24	0.23	0.25	0.23	0.28	0.39	0.28
4	0.23	0.22	0.29	0.22	0.23	0.22	0.23	0.26	0.39	0.3
5	0.23	0.23	0.3	0.23	0.25	0.23	0.23	0.27	0.43	0.31
6	0.23	0.24	0.29	0.22	0.23	0.24	0.24	0.27	0.47	0.31
7	0.2	0.2	0.26	0.22	0.22	0.2	0.23	0.24	0.43	0.31
8	0.22	0.21	0.28	0.22	0.23	0.22	0.23	0.27	0.46	0.35
9	0.24	0.22	0.28	0.21	0.22	0.22	0.23	0.27	0.46	0.39
10	0.23	0.22	0.3	0.24	0.24	0.24	0.24	0.28	0.48	0.45
D117A
	0,01 mM KCl	0,02 mM KCl	0,03 mM KCl	0,05 mM KCl	0,1 mM KCl	0,2 mM KCl	0,5 mM KCl	1 mM KCl	3 mM KCl	10 mM KCl
t (hours)	OD (600nm)	OD (600nm)	OD (600nm)	OD (600nm)	OD (600nm)	OD (600nm)	OD (600nm)	OD (600nm)	OD (600nm)	OD (600nm)		[KCl] (mM)	growth rate (1/Hour)
0	0.16	0.17	0.18	0.18	0.18	0.18	0.18	0.21	0.2	0.21		0.01	0.01579
1.1	0.18	0.17	0.2	0.17	0.21	0.2	0.23	0.22	0.21	0.18		0.02	0.02038
1.91	0.21	0.19	0.23	0.22	0.25	0.28	0.26	0.3	0.26	0.27		0.03	0.03545
3	0.22	0.21	0.24	0.25	0.29	0.34	0.42	0.44	0.41	0.35		0.05	0.062
4	0.25	0.27	0.3	0.33	0.37	0.51	0.52	0.58	0.55	0.49		0.1	0.1012
5	0.28	0.29	0.3	0.34	0.43	0.68	0.75	0.77	0.72	0.55		0.2	0.1281
6	0.28	0.27	0.32	0.4	0.54	0.79	0.96	0.9	0.89	0.71		0.5	0.1442
7	0.29	0.28	0.38	0.47	0.68	1.04	1.04	1.13	1.11	0.95		1	0.1461
8.16	0.3	0.3	0.45	0.54	0.8	1.05	1.22	1.24	1.22	1.03		3	0.1434
9	0.33	0.34	0.47	0.63	0.85	1.2	1.29	1.38	1.33	1.05
10	0.34	0.39	0.5	0.74	1.09	1.22	1.37	1.39	1.31	1.07
D117N
	0,01 mM KCl	0,02 mM KCl	0,03 mM KCl	0,05 mM KCl	0,1 mM KCl	0,2 mM KCl	0,5 mM KCl	1 mM KCl	3 mM KCl	10 mM KCl
t (hours)	OD (600nm)	OD (600nm)	OD (600nm)	OD (600nm)	OD (600nm)	OD (600nm)	OD (600nm)	OD (600nm)	OD (600nm)	OD (600nm)		[KCl] (mM)	growth rate (1/Hour)
0	0.2	0.2	0.2	0.18	0.18	0.19	0.19	0.2	0.18	0.23		0.01	0.0152
1	0.25	0.23	0.24	0.24	0.23	0.22	0.24	0.26	0.24	0.25		0.02	0.0328
2	0.28	0.28	0.26	0.29	0.29	0.29	0.33	0.32	0.3	0.33		0.03	0.0277
3	0.26	0.26	0.3	0.28	0.32	0.35	0.4	0.38	0.39	0.35		0.05	0.0443
4	0.29	0.32	0.31	0.34	0.42	0.42	0.49	0.56	0.44	0.42		0.1	0.0735
5	0.33	0.3	0.33	0.36	0.43	0.5	0.68	0.65	0.62	0.46		0.2	0.1145
6	0.34	0.38	0.36	0.4	0.54	0.67	0.81	0.79	0.76	0.61		0.5	0.1432
7	0.36	0.4	0.38	0.45	0.55	0.71	0.97	1.03	0.9	0.63		1	0.1428
8	0.36	0.43	0.38	0.52	0.61	0.89	1.11	1.23	1	0.69		3	0.1252
9	0.36	0.49	0.43	0.59	0.85	1.03	1.34	1.25	1.16	0.93
10	0.39	0.52	0.53	0.61	0.87	1.21	1.39	1.38	1.25	1.09
D117E
	0,01 mM KCl	0,02 mM KCl	0,03 mM KCl	0,05 mM KCl	0,1 mM KCl	0,2 mM KCl	0,5 mM KCl	1 mM KCl	3 mM KCl	10 mM KCl
t (hours)	OD (600nm)	OD (600nm)	OD (600nm)	OD (600nm)	OD (600nm)	OD (600nm)	OD (600nm)	OD (600nm)	OD (600nm)	OD (600nm)		[KCl] (mM)	growth rate (1/Hour)
0	0.21	0.18	0.21	0.25	0.2	0.21	0.23	0.22	0.24	0.2		0.01	0.0156
1	0.26	0.22	0.28	0.27	0.28	0.26	0.32	0.29	0.28	0.26		0.02	0.0248
2	0.31	0.29	0.34	0.3	0.38	0.35	0.4	0.46	0.4	0.34		0.03	0.0373
3	0.35	0.32	0.39	0.36	0.44	0.47	0.58	0.53	0.53	0.45		0.05	0.0503
4	0.37	0.33	0.39	0.41	0.56	0.55	0.69	0.7	0.6	0.5		0.1	0.0892
5	0.38	0.36	0.42	0.5	0.6	0.68	0.8	0.84	0.77	0.63		0.2	0.1465
6	0.42	0.4	0.46	0.53	0.76	0.82	1.08	1.17	0.91	0.74		0.5	0.203
7	0.39	0.4	0.54	0.5	0.77	0.95	1.32	1.4	1.04	0.83		1	0.1858
8	0.41	0.47	0.53	0.54	0.89	1.16	1.64	1.62	1.37	1.04		3	0.1808
9	0.42	0.47	0.59	0.68	0.96	1.33	1.86	1.74	1.53	1.19
10	0.47	0.47	0.65	0.75	1.12	1.53	1.88	1.74	1.91	1.46
T121A
	0,01 mM KCl	0,02 mM KCl	0,03 mM KCl	0,05 mM KCl	0,1 mM KCl	0,2 mM KCl	0,5 mM KCl	1 mM KCl	3 mM KCl	10 mM KCl
t (hours)	OD (600nm)	OD (600nm)	OD (600nm)	OD (600nm)	OD (600nm)	OD (600nm)	OD (600nm)	OD (600nm)	OD (600nm)	OD (600nm)		[KCl] (mM)	growth rate (1/Hour)
0	0.12	0.15	0.14	0.17	0.17	0.16	0.15	0.13	0.14	0.16		0.01	0.00383
1	0.19	0.18	0.18	0.2	0.21	0.18	0.21	0.2	0.18	0.15		0.02	0.005
2	0.17	0.19	0.19	0.22	0.24	0.23	0.23	0.22	0.2	0.16		0.03	0.00567
3	0.2	0.22	0.22	0.25	0.27	0.25	0.31	0.27	0.25	0.2		0.05	0.0128
4	0.22	0.23	0.24	0.28	0.32	0.28	0.32	0.32	0.3	0.21		0.1	0.02217
5	0.19	0.23	0.22	0.3	0.31	0.32	0.4	0.42	0.36	0.23		0.2	0.04133
6	0.22	0.22	0.21	0.28	0.32	0.36	0.46	0.46	0.45	0.24		0.5	0.05617
7	0.22	0.24	0.23	0.27	0.32	0.38	0.48	0.5	0.47	0.26		1	0.07267
8	0.22	0.25	0.25	0.33	0.38	0.44	0.58	0.62	0.54	0.27		3	0.05867
9	0.2	0.25	0.23	0.31	0.39	0.47	0.62	0.71	0.6	0.26
10	0.22	0.23	0.26	0.35	0.45	0.59	0.69	0.81	0.67	0.26
S125A
	0,01 mM KCl	0,02 mM KCl	0,03 mM KCl	0,05 mM KCl	0,1 mM KCl	0,2 mM KCl	0,5 mM KCl	1 mM KCl	3 mM KCl	10 mM KCl
t (hours)	OD (600nm)	OD (600nm)	OD (600nm)	OD (600nm)	OD (600nm)	OD (600nm)	OD (600nm)	OD (600nm)	OD (600nm)	OD (600nm)		[KCl] (mM)	growth rate (1/Hour)
0	0.16	0.17	0.15	0.15	0.15	0.17	0.18	0.17	0.17	0.17		0.01	0.012
1	0.17	0.22	0.18	0.2	0.19	0.2	0.19	0.19	0.22	0.17		0.02	0.0166
2	0.22	0.2	0.2	0.22	0.25	0.24	0.24	0.2	0.22	0.18		0.03	0.0201
3	0.24	0.23	0.24	0.25	0.27	0.3	0.28	0.27	0.26	0.22		0.05	0.0183
4	0.26	0.26	0.26	0.26	0.29	0.32	0.33	0.32	0.28	0.22		0.1	0.046
5	0.26	0.25	0.27	0.28	0.34	0.36	0.4	0.4	0.34	0.3		0.2	0.056
6	0.28	0.28	0.28	0.28	0.39	0.42	0.52	0.55	0.38	0.28		0.5	0.0963
7	0.28	0.28	0.32	0.34	0.46	0.5	0.63	0.66	0.45	0.29		1	0.1145
8	0.28	0.31	0.34	0.33	0.49	0.58	0.7	0.77	0.47	0.32
9	0.3	0.32	0.36	0.35	0.55	0.65	0.87	0.9	0.55	0.33
10	0.34	0.35	0.36	0.37	0.6	0.7	1	1.1	0.7	0.35
T230A
	0,01 mM KCl	0,02 mM KCl	0,03 mM KCl	0,05 mM KCl	0,1 mM KCl	0,2 mM KCl	0,5 mM KCl	1 mM KCl	3 mM KCl	10 mM KCl
t (hours)	OD (600nm)	OD (600nm)	OD (600nm)	OD (600nm)	OD (600nm)	OD (600nm)	OD (600nm)	OD (600nm)	OD (600nm)	OD (600nm)		[KCl] (mM)	growth rate (1/Hour)
0	0.18	0.16	0.14	0.17	0.14	0.15	0.16	0.16	0.16	0.17		0.01	0.019
1	0.2	0.21	0.2	0.21	0.21	0.22	0.25	0.23	0.21	0.21		0.02	0.02533
2	0.24	0.24	0.25	0.24	0.29	0.29	0.28	0.26	0.25	0.24		0.03	0.02783
3	0.27	0.28	0.26	0.27	0.29	0.33	0.36	0.34	0.34	0.27		0.05	0.03683
4	0.26	0.3	0.27	0.31	0.38	0.41	0.43	0.41	0.36	0.33		0.1	0.0755
5	0.29	0.31	0.32	0.34	0.43	0.49	0.55	0.48	0.43	0.34		0.2	0.109
6	0.29	0.32	0.34	0.37	0.55	0.61	0.68	0.62	0.55	0.39		0.5	0.111
7	0.34	0.36	0.37	0.42	0.6	0.72	0.76	0.67	0.51	0.44		1	0.10883
8	0.37	0.39	0.43	0.48	0.64	0.86	0.93	0.92	0.6	0.5
9	0.36	0.39	0.44	0.48	0.77	1	1.03	0.94	0.66	0.5
10	0.39	0.48	0.44	0.53	0.89	1.14	1.14	1.14	0.82	0.51
E233A
	0,01 mM KCl	0,02 mM KCl	0,03 mM KCl	0,05 mM KCl	0,1 mM KCl	0,2 mM KCl	0,5 mM KCl	1 mM KCl	3 mM KCl	10 mM KCl
t (hours)	OD (600nm)	OD (600nm)	OD (600nm)	OD (600nm)	OD (600nm)	OD (600nm)	OD (600nm)	OD (600nm)	OD (600nm)	OD (600nm)
0	0.15	0.19	0.17	0.17	0.19	0.16	0.17	0.21	0.19	0.19
1	0.19	0.22	0.22	0.19	0.2	0.2	0.24	0.25	0.24	0.26
2	0.21	0.25	0.23	0.19	0.22	0.21	0.24	0.28	0.27	0.3
3	0.21	0.25	0.26	0.2	0.23	0.21	0.25	0.31	0.28	0.3
4	0.22	0.26	0.26	0.2	0.24	0.24	0.26	0.3	0.31	0.32
5	0.21	0.25	0.24	0.2	0.23	0.22	0.27	0.32	0.3	0.34
6	0.21	0.24	0.24	0.19	0.24	0.23	0.27	0.32	0.32	0.36
7	0.21	0.23	0.24	0.2	0.24	0.23	0.28	0.32	0.33	0.38
8	0.21	0.23	0.24	0.21	0.24	0.23	0.25	0.33	0.35	0.39
9	0.2	0.23	0.24	0.19	0.23	0.22	0.26	0.33	0.37	0.39
10	0.2	0.24	0.22	0.18	0.24	0.24	0.25	0.32	0.35	0.39
E233Q
	0,01 mM KCl	0,02 mM KCl	0,03 mM KCl	0,05 mM KCl	0,1 mM KCl	0,2 mM KCl	0,5 mM KCl	1 mM KCl	3 mM KCl	10 mM KCl
t (hours)	OD (600nm)	OD (600nm)	OD (600nm)	OD (600nm)	OD (600nm)	OD (600nm)	OD (600nm)	OD (600nm)	OD (600nm)	OD (600nm)
0	0.18	0.2	0.2	0.22	0.21	0.2	0.17	0.2	0.21	0.19
1	0.21	0.22	0.26	0.25	0.26	0.25	0.23	0.25	0.27	0.22
2	0.23	0.25	0.29	0.28	0.27	0.26	0.23	0.29	0.32	0.27
3	0.24	0.24	0.26	0.28	0.25	0.27	0.25	0.28	0.31	0.27
4	0.24	0.26	0.23	0.26	0.26	0.26	0.25	0.32	0.35	0.33
5	0.25	0.27	0.27	0.27	0.28	0.28	0.25	0.32	0.36	0.34
6	0.27	0.28	0.29	0.29	0.29	0.29	0.26	0.36	0.41	0.39
7	0.26	0.28	0.28	0.28	0.27	0.29	0.27	0.36	0.39	0.39
8	0.24	0.26	0.27	0.2	0.26	0.27	0.26	0.35	0.41	0.41
9	0.24	0.26	0.29	0.29	0.28	0.26	0.28	0.38	0.41	0.41
10	0.25	0.28	0.27	0.28	0.28	0.28	0.27	0.37	0.4	0.47
Y377A
	0,01 mM KCl	0,02 mM KCl	0,03 mM KCl	0,05 mM KCl	0,1 mM KCl	0,2 mM KCl	0,5 mM KCl	1 mM KCl	3 mM KCl	10 mM KCl
t (hours)	OD (600nm)	OD (600nm)	OD (600nm)	OD (600nm)	OD (600nm)	OD (600nm)	OD (600nm)	OD (600nm)	OD (600nm)	OD (600nm)		[KCl] (mM)	growth rate (1/Hour)
0	0.18	0.18	0.18	0.16	0.19	0.19	0.14	0.2	0.18	0.2		0.01	0
1	0.21	0.21	0.21	0.21	0.24	0.23	0.19	0.25	0.23	0.25		0.02	0
2	0.21	0.22	0.21	0.21	0.24	0.24	0.2	0.28	0.26	0.28		0.03	0
3	0.25	0.22	0.22	0.23	0.26	0.25	0.23	0.33	0.28	0.32		0.05	0
4	0.25	0.25	0.22	0.25	0.27	0.25	0.23	0.33	0.34	0.37		0.1	0.0035
5	0.23	0.24	0.22	0.23	0.26	0.28	0.22	0.32	0.39	0.46		0.2	0.0017
6	0.24	0.24	0.21	0.22	0.25	0.27	0.24	0.36	0.36	0.48		0.5	0.007
7	0.23	0.26	0.22	0.23	0.26	0.27	0.25	0.36	0.4	0.62		1	0.01567
8	0.22	0.24	0.22	0.22	0.3	0.25	0.25	0.4	0.46	0.67		3	0.02683
9	0.25	0.24	0.21	0.23	0.27	0.25	0.24	0.45	0.44	0.71		10	0.06883
10	0.22	0.23	0.22	0.22	0.27	0.26	0.28	0.38	0.48	0.83
